# Supplementary material for: Protein kinase inhibitor SU6668 attenuates positive regulation of Gli proteins in cancer and multipotent progenitor cells
Source: PubMed Central journal article supplement (PMC3946003; doi:10.1016/j.bbamcr.2014.01.003), 2014-04
Supplement: mmc1.pdf [file mmc1.pdf]

Supplementary Table 1 Donors of the cells used in the present study

ASCs – adipose tissue derived stromal cells; PBMCs – peripheral blood mononuclear cells

| <i>Population</i> | <i>Cell type</i> | <i>Age</i> | <i>Gender</i> | <i>Body area</i> |
|-------------------|------------------|------------|---------------|------------------|
| 1                 | ASCs             | 27         | female        | abdomen          |
| 2                 | ASCs             | 51         | female        | breast           |
| 3                 | ASCs             | 71         | male          | unknown          |
| 4                 | ASCs             | 47         | female        | abdomen          |
| 5                 | ASCs             | 41         | female        | abdomen          |
| 6                 | ASCs             | 35         | female        | hips             |
| 7                 | ASCs             | 42         | female        | breast           |
| 8                 | ASCs             | 38         | male          | abdomen          |
| 9                 | ASCs             | 70         | female        | buttocks         |
| 10                | ASCs             | 46         | female        | abdomen          |
| 11                | ASCs             | 32         | female        | hips             |
|                   | PBMCs            | 30         | female        |                  |
|                   | PBMCs            | 35         | male          |                  |
|                   | PBMCs            | 66         | male          |                  |
