# Supplementary material for: Protein kinase inhibitor SU6668 attenuates positive regulation of Gli proteins in cancer and multipotent progenitor cells
Source: PubMed Central journal article supplement (PMC3946003; doi:10.1016/j.bbamcr.2014.01.003), 2014-04
Supplement: mmc3.pdf [file mmc3.pdf]

Supplementary Table 3 List of primers

| <i>Gene</i>  | <i>Direction</i> | <i>Sequence 5'-3'</i>      | <i>GenBank Accession number</i>                                                                                         | <i>Expected product length, nt</i> |
|--------------|------------------|----------------------------|-------------------------------------------------------------------------------------------------------------------------|------------------------------------|
| <i>GAPDH</i> | sense            | CTCTCTGCTCCTCCTGTTTCGAC    | NM_002046.4                                                                                                             | 68                                 |
|              | antisense        | TGAGCGATGTGGCTCGGCT        |                                                                                                                         |                                    |
| <i>GLI1</i>  | sense            | CAAGTGCACGTTTGAAGGGT       | NM_001167609.1<br>NM_001160045.1<br>NM_005269.2                                                                         | 177                                |
|              | antisense        | CTTCTCATTGGAATGGGTCC       |                                                                                                                         |                                    |
| <i>GLI2</i>  | sense            | CCTTCAGCAATGCCAGTGA        | NM_001167609.1<br>NM_001160045.1<br>NM_005269.2                                                                         | 108                                |
|              | antisense        | CTAGGATCTGTATAGCGTTT       |                                                                                                                         |                                    |
| <i>GLI2</i>  | sense            | CATCTCCACGACTACCTCAAC      | NM_005270.4                                                                                                             | 157                                |
|              | antisense        | ACTAGCGAGTTGGGTGAGG        |                                                                                                                         |                                    |
| <i>ULK3</i>  | sense            | GACATGCGACACCAGGAAGGAAGGT  | NM_005270.4                                                                                                             | 114                                |
|              | antisense        | GCCGGATCAAGGAGATGTCAGAGATG |                                                                                                                         |                                    |
| <i>PTCH1</i> | sense            | AAGGAGCAGGTCAAGATGAG       | NM_001099436.1                                                                                                          | 88                                 |
|              | antisense        | GTGCAAGAGCTACGAACAGA       |                                                                                                                         |                                    |
| <i>PTCH1</i> | sense            | AACGGAATATCTCTCACCTG       | NM_001099436.1                                                                                                          | 96                                 |
|              | antisense        | TGTGCGAAACCAAAGTCTGC       |                                                                                                                         |                                    |
| <i>PTCH1</i> | sense            | GAATGGATCAGACGATGGAG       | NM_001083605.1<br>NM_001083602.1<br>NM_001083604.1<br>NM_001083607.1<br>NM_000264.3<br>NM_001083606.1<br>NM_001083603.1 | 125                                |
|              | antisense        | GGATTAATGATGCCATCTGC       |                                                                                                                         |                                    |
| <i>PTCH1</i> | sense            | ATCCCTTTTGGAGGACAGGAC      | NM_001083605.1<br>NM_001083602.1<br>NM_001083604.1<br>NM_001083607.1<br>NM_000264.3<br>NM_001083606.1<br>NM_001083603.1 | 174                                |
|              | antisense        | ATTGCAGGAAAAATGAGCAG       |                                                                                                                         |                                    |
| <i>SHH</i>   | sense            | ACTCCGAGCGATTTAAGGAAC      | NM_000193.2                                                                                                             | 248                                |
|              | antisense        | CAGACGTGGTGATGTCCACTG      |                                                                                                                         |                                    |
| <i>SMO</i>   | sense            | GGGAGGCTACTTCCTCATCC       | NM_005631.4                                                                                                             | 166                                |
|              | antisense        | GGCAGCTGAAGGTAATGAGC       |                                                                                                                         |                                    |
| <i>CTGF</i>  | sense            | GCTTACCGACTGGAAGACACG      | NM_001901.2                                                                                                             | 232                                |
|              | antisense        | CGGATGCACTTTTTGCCTT        |                                                                                                                         |                                    |
| <i>SNAI1</i> | sense            | GCCTTCAACTGCAAATACTGC      | NM_005985.3                                                                                                             | 248                                |
|              | antisense        | CTTCTTGACATCTGAGTGGGTC     |                                                                                                                         |                                    |
| <i>SMAD7</i> | sense            | ACTCCAGATACCCGATGGATTT     | NM_001190822.1<br>NM_001190821.1<br>NM_005904.3                                                                         | 173                                |
|              | antisense        | CCTCCCAGTATGCCACCAC        |                                                                                                                         |                                    |
| <i>PAI1</i>  | sense            | CGATGGCCATTACTIONACGACA    | NM_000602.4                                                                                                             | 108                                |
|              | antisense        | GTTGGTGAGGGCAGAGAGAG       |                                                                                                                         |                                    |
| <i>Hprt</i>  | sense            | CAGTCCCAGCGTCGTGATTA       | NM_013556.2                                                                                                             | 138                                |
|              | antisense        | AGCAAGTCTTTCAGTCCTGTC      |                                                                                                                         |                                    |
| <i>Gli1</i>  | sense            | AACTCCACAGGCACACAGGAT      | NM_010296.2                                                                                                             | 173                                |
|              | antisense        | ATGCTCACTGTTGATGTGGT       |                                                                                                                         |                                    |
| <i>Gli1</i>  | sense            | ACGTTTGAAGGCTGTCGGAA       | NM_010296.2                                                                                                             | 181                                |
|              | antisense        | CACACGTATGGCTTCTCATT       |                                                                                                                         |                                    |

Supplementary Table 3 List of primers (continued)

| <i>Gene</i>  | <i>Direction</i> | <i>Sequence 5'-3'</i>   | <i>GenBank Accession number</i> | <i>Expected product length, nt</i> |
|--------------|------------------|-------------------------|---------------------------------|------------------------------------|
| <i>Ptch1</i> | sense            | TTGTCAGATACTTCTTTGCC    | NM_008957.2                     | 121                                |
|              | antisense        | ATTGGCTGGAGACACCTCAG    |                                 |                                    |
|              | sense            | TCCTCGCTTACAAACTCCTG    | NM_008957.2                     | 105                                |
|              | antisense        | GGATTAATGATGCCATCTGC    |                                 |                                    |
| <i>Gli2</i>  | sense            | CGCTTTGAGCAGCTGAAGAG    | NM_001081125.1                  | 119                                |
|              | antisense        | GACAGAACCATTGACTGGAA    |                                 |                                    |
|              | sense            | GACCTGAGGAGAGTGTGGAG    | NM_001081125.1                  | 133                                |
|              | antisense        | CTCGCTGCTGCAGGATGACT    |                                 |                                    |
| <i>Ulk3</i>  | sense            | AGGAGCAGATCAAGATAAG     | NM_027895.1                     | 87                                 |
|              | antisense        | GTGCAAGAACTACGAACAGA    |                                 |                                    |
|              | sense            | ACGAAACATCTCTCACTTG     | NM_027895.1                     | 98                                 |
|              | antisense        | TGCTGGGCAAAGCCAAAGTC    |                                 |                                    |
| <i>Runx2</i> | sense            | CAGAGGGCACAAAGTTCTATCTG | NM_009820.4<br>NM_001146038.1   | 167                                |
|              | antisense        | CTCACGTCGCTCATCTTGC     |                                 |                                    |
|              | sense            | TAACTTGTGGCTGTTGTGATGCG | NM_001145920.1                  | 103                                |
|              | antisense        | CTCACGTCGCTCATCTTGC     |                                 |                                    |
| <i>Sp7</i>   | sense            | GATGGCGTCCTCTCTGCTTG    | NM_130458.3                     | 150                                |
|              | antisense        | GTCAGCGTATGGCTTCTTTGTG  |                                 |                                    |
